# Supplementary material
Source: PubMed Central journal article supplement (PMC4583422)
Supplement: NIHMS722301-supplement-Supporting_Information.pdf [file NIHMS722301-supplement-Supporting_Information.pdf]

*Supporting Information for:*

Towards Relatively General and Accurate Quantum Chemical  
Predictions of Solid-State  $^{17}\text{O}$  NMR Chemical Shifts in Various  
Biologically Relevant Oxygen-containing Compounds

By

Amber Rorick, Matthew A. Michael, Liu Yang and Yong Zhang\*

Department of Chemistry, Chemical Biology and Biomedical Engineering, Stevens Institute of  
Technology, 1 Castle Point on Hudson, Hoboken NJ 07030, USA

**Methodological study for Compound 6**

This compound was found to be challenging in the previous work,<sup>1</sup> with errors in  $\delta_{\text{iso}}$  of 202-218 ppm (28%-30% of the experimental shift). With the X-ray structure, we first tried a few different metal bases in the NMR calculation to see how this factor affects the prediction accuracy. As shown in Table S1, both the pure DFT method OP86 and the hybrid DFT method B3LYP were used, along with a locally dense basis set scheme using a large 6-311++G(2d,2p) basis for atoms in the metal first coordination shell and 6-31G(d) for other atoms. The metal bases studied are the effective core potential type bases in the Gaussian 09 software: CEP-121G, LanL2DZ, and SDD. This is similar to the approach used in the previous calculations of  $^{15}\text{N}$  NMR chemical shifts in metal- and NO-containing systems.<sup>2</sup> Results in Table S1 indicate that although the errors of 171-192 ppm are slightly better than the previous work, they are still significant, 24-27% of the experimental shift.

**Table S1.** Calculated  $^{17}\text{O}$  NMR Isotropic Chemical Shift

| Method | Metal basis | First coordination shell basis | Other atoms' basis | $\delta_{\text{iso}}$ (ppm) |
|--------|-------------|--------------------------------|--------------------|-----------------------------|
| Expt.  |             |                                |                    | 717                         |

|       |          |                 |          |     |
|-------|----------|-----------------|----------|-----|
| B3LYP | CEP-121G | 6-311++G(2d,2p) | 6-31G(d) | 896 |
| OP86  | CEP-121G | 6-311++G(2d,2p) | 6-31G(d) | 907 |
| B3LYP | LanL2DZ  | 6-311++G(2d,2p) | 6-31G(d) | 888 |
| OP86  | LanL2DZ  | 6-311++G(2d,2p) | 6-31G(d) | 899 |
| B3LYP | SDD      | 6-311++G(2d,2p) | 6-31G(d) | 897 |
| OP86  | SDD      | 6-311++G(2d,2p) | 6-31G(d) | 909 |

Then, we worked on geometry-optimized structures of **6** with hydrogen positions being optimized. We first wanted to evaluate the effects of metal basis on both geometry optimization and NMR calculation. The basis for non-metal atoms is 6-311G(d) in the geometry optimization, which is relatively larger than 6-31G(d) used in the Text for organic molecule **1**, because **6** is a metal-containing system. The basis for non-metal atoms in the NMR calculation is 6-311++G(d,p), based on its good performance in the studies of organic molecules **1-4**. The method for NMR calculation here was OP86, since 1) it was found to yield excellent predictions for non-metal systems **1-4**, 2) its error listed in Table S1 is similar to that for B3LYP (~11 ppm difference, 1.5% of the experimental shift), 3) a more detailed study of NMR calculation method was to be discussed later. The partial geometry optimization method chosen here is B3LYP, with a more detailed study of geometry optimization method to be discussed later. As shown in Table S2, the effects of metal basis are actually very significant. For instance, with the same QZVP metal basis in optimization, the predicted isotropic shifts vary as much as 277 ppm among the different metal basis used in NMR calculations. The best metal basis for NMR calculation was found to be LanL2DZ. With the same LanL2DZ basis in NMR calculation, the use of different metal basis in geometry optimization also results in 139 ppm differences, with QZVP yielding the best prediction with an error of 71 ppm, which is more than half smaller than errors in Tables S1. These studies clearly indicate the selection of metal basis is critical for the accuracy in  $^{17}\text{O}$  NMR chemical shift predictions.

**Table S2.** Partial Optimization with B3LYP and NMR Calculation with OP86

| Optimization Basis for Sn | NMR Calculation basis for Sn | $\delta_{\text{iso}}$ (ppm) | $\delta_{11}$ (ppm) | $\delta_{22}$ (ppm) | $\delta_{33}$ (ppm) |
|---------------------------|------------------------------|-----------------------------|---------------------|---------------------|---------------------|
| Expt.                     | Expt.                        | 717                         | 1450                | 600                 | 100                 |
| QZVP                      | QZVP                         | 1065                        | 2416                | 657                 | 122                 |
| QZVP                      | DGDZVP                       | 794                         | 1720                | 621                 | 39                  |
| QZVP                      | cc-pwCVDZ-PP <sup>a)</sup>   | 893                         | 1857                | 651                 | 172                 |
| QZVP                      | LanL2DZ                      | 788                         | 1701                | 623                 | 41                  |
| SDD                       | SDD                          | 938                         | 2078                | 672                 | 65                  |
| SDD                       | DGDZVP                       | 934                         | 2072                | 665                 | 64                  |
| SDD                       | cc-pwCVDZ-PP <sup>a)</sup>   | 1029                        | 2195                | 701                 | 192                 |
| LanL2DZ                   | LanL2DZ                      | 927                         | 2049                | 667                 | 65                  |
| CEP-121G                  | LanL2DZ                      | 927                         | 2050                | 667                 | 64                  |

a) This is from EMSL basis set exchange website: <https://bse.pnl.gov/bse/portal>, while all other bases are from Gaussian 09 program.

With the QZVP metal basis for optimization and LanL2DZ metal basis for NMR calculation from above calculations, we then performed a more detailed study of geometry optimization method to see if other methods could further improve the accuracy. Interestingly, even 20 different DFT methods were studied, the predicted isotropic shifts display a relatively much smaller range (762-790 ppm, see Table S3), compared to the effect of metal basis in geometry optimization in Table S2. In fact, the final two methods used in the Text for a broader range of systems also show that the method for geometry optimization is less critical. Here, the best method is mPWP86, with an error now reduced to 45 ppm (6.3% of the experimental isotropic shift). With this geometry optimization method, we further tested a few more metal bases as shown in Table S4. It is interesting to note that except for the all-electron basis set DGDZVP which produced the same results as with the all-electron basis QZVP, all other effective core potential bases yielded larger errors. Therefore, these calculations further support the use of QZVP as an excellent metal basis in geometry optimization. As a result, we used the mPW86 method with a QZVP metal basis and 6-311G(d) for non-metals in the geometry optimization part of subsequent calculations.

**Table S3.** Partial Optimization with Different Methods and NMR Calculation with OP86

| Method  | $\delta_{\text{iso}}$<br>(ppm) | $\delta_{11}$<br>(ppm) | $\delta_{22}$<br>(ppm) | $\delta_{33}$<br>(ppm) |
|---------|--------------------------------|------------------------|------------------------|------------------------|
| Expt.   | 717                            | 1450                   | 600                    | 100                    |
| PBEPBE  | 783                            | 1635                   | 673                    | 40                     |
| M06     | 776                            | 1668                   | 618                    | 40                     |
| M06L    | 780                            | 1678                   | 620                    | 40                     |
| BP86    | 763                            | 1635                   | 615                    | 39                     |
| BPBE    | 764                            | 1639                   | 615                    | 39                     |
| BPW91   | 766                            | 1642                   | 616                    | 39                     |
| BVWN5   | 789                            | 1703                   | 623                    | 41                     |
| BVWN    | 790                            | 1704                   | 623                    | 41                     |
| mPWB95  | 763                            | 1636                   | 615                    | 39                     |
| mPWLYP  | 777                            | 1671                   | 619                    | 40                     |
| mPWP86  | 762                            | 1633                   | 615                    | 39                     |
| mPWPL   | 788                            | 1700                   | 623                    | 41                     |
| mPWVWN  | 789                            | 1703                   | 623                    | 41                     |
| B3LYP   | 788                            | 1701                   | 623                    | 41                     |
| mPWPBE  | 764                            | 1637                   | 615                    | 39                     |
| mPWVWN5 | 789                            | 1701                   | 623                    | 41                     |
| BB95    | 763                            | 1636                   | 615                    | 39                     |
| BLYP    | 777                            | 1671                   | 619                    | 40                     |
| BTPSS   | 763                            | 1636                   | 615                    | 39                     |
| mPWTPSS | 763                            | 1636                   | 615                    | 39                     |

**Table S4.** Different Metal Bases with the mPWP86 Partial Optimization

| Basis set in Popt | $\delta_{\text{iso}}$<br>(ppm) | $\delta_{11}$<br>(ppm) | $\delta_{22}$<br>(ppm) | $\delta_{33}$<br>(ppm) |
|-------------------|--------------------------------|------------------------|------------------------|------------------------|
| CEP-4G            | 927                            | 2049                   | 667                    | 64                     |
| CEP-31G           | 927                            | 2049                   | 667                    | 64                     |
| CEP-121G          | 927                            | 2049                   | 667                    | 64                     |
| DGDZVP            | 762                            | 1633                   | 615                    | 39                     |
| LanL2DZ           | 926                            | 2047                   | 667                    | 64                     |
| LanL2MB           | 927                            | 2050                   | 668                    | 64                     |
| SDD               | 926                            | 2046                   | 667                    | 65                     |

We then performed a more detailed study of the NMR calculation method, with the LanL2DZ basis for metal and 6-311++G(d,p) for non-metal atoms based on the results discussed above (Table S2), in order to see if other methods could further improve the accuracy. Here, the 18 different DFT methods in the NMR calculation step yielded a range of 762-822 ppm, which is larger than the calculated range from using different geometry optimization methods. This indicates that the method of the NMR calculation is also important. But this range is still smaller than those from using different metal bases in both geometry optimization and NMR calculation.

Therefore, this methodological study suggests that the most important part for  $^{17}\text{O}$  NMR chemical shift predictions in metal-containing systems may be the metal bases in both the geometry optimization and NMR calculation steps, and the second most important factor is the NMR calculation method, while the geometry optimization method is less critical.

As shown in Table S5, the best NMR shift prediction method for compound **6** is still OP86. The next best predicted  $\delta_{\text{iso}}$ 's are around 780 ppm, from using several methods, including B3LYP. Since B3LYP predicted  $\delta_{\text{iso}}$  has only 2.8% larger error compared with the value from using OP86 and it was used widely in previous studies of many different systems,<sup>1, 3-7</sup> both OP86 and B3LYP methods were further evaluated in the  $^{17}\text{O}$  NMR chemical shift calculations of other systems discussed in the Text.

**Table S5.** Results from Using Different DFT methods in NMR Calculations. (Unit: ppm)

| Methods | $\delta_{\text{iso}}$ | $\delta_{11}$ | $\delta_{22}$ | $\delta_{33}$ |
|---------|-----------------------|---------------|---------------|---------------|
| Expt.   | 717                   | 1450          | 600           | 100           |
| BP86    | 780                   | 1698          | 685           | 95            |
| BPBE    | 787                   | 1720          | 686           | 94            |
| BPW91   | 788                   | 1719          | 688           | 95            |
| BVWN5   | 781                   | 1683          | 697           | 100           |
| BVWN    | 780                   | 1683          | 696           | 100           |
| mPWB95  | 822                   | 1802          | 703           | 99            |
| mPWLYP  | 782                   | 1687          | 696           | 102           |
| mPWP86  | 780                   | 1696          | 686           | 96            |
| mPWPL   | 781                   | 1682          | 698           | 101           |
| mPWVWN  | 780                   | 1681          | 697           | 101           |
| mPWPBE  | 787                   | 1717          | 687           | 95            |
| mPWVWN5 | 781                   | 1681          | 697           | 101           |
| BB95    | 822                   | 1804          | 703           | 98            |
| BLYP    | 782                   | 1689          | 695           | 101           |

---

|         |     |      |     |    |
|---------|-----|------|-----|----|
| B3LYP   | 782 | 1681 | 719 | 86 |
| BTPSS   | 792 | 1732 | 687 | 95 |
| mPWTPSS | 792 | 1730 | 688 | 96 |
| OP86    | 762 | 1679 | 661 | 85 |

---

## References

- (1) Wu, G.; Zhu, J.; Mo, X.; Wang, R.; Terskikh, V. Solid-state  $^{17}\text{O}$  NMR and Computational Studies of C-nitrosoarene Compounds. *J. Am. Chem. Soc.* **2010**, *132*, 5143-5155.
- (2) Ling, Y.; Mills, C.; Weber, R.; Yang, L.; Zhang, Y. NMR, IR/Raman, and Structural Properties in HNO and RNO (R = alkyl and aryl) Metalloporphyrins with Implication for the HNO-myoglobin Complex. *J. Am. Chem. Soc.* **2010**, *132*, 1583-1591.
- (3) Amini, S. K.; Shaghghi, H.; Bain, A. D.; Chabok, A.; Tafazzoli, M. Magnetic Resonance Tensors in Uracil: Calculation of  $^{13}\text{C}$ ,  $^{15}\text{N}$ ,  $^{17}\text{O}$  NMR Chemical Shifts,  $^{17}\text{O}$  and  $^{14}\text{N}$  Electric Field Gradients and Measurement of  $^{13}\text{C}$  and  $^{15}\text{N}$  Chemical Shifts. *Solid State Nucl. Magn. Reson.* **2010**, *37*, 13-20.
- (4) Yamada, K.; Nemoto, T.; Asanuma, M.; Honda, H.; Yamazaki, T.; Hirota, H. Both Experimental and Theoretical Investigations of Solid-state  $^{17}\text{O}$  NMR for L-valine and L-isoleucine. *Solid State Nucl. Magn. Reson.* **2006**, *30*, 182-191.
- (5) Wong, A.; Pike, K. J.; Jenkins, R.; Clarkson, G. J.; Anupold, T.; Howes, A. P.; Crout, D. H.; Samoson, A.; Dupree, R.; Smith, M. E. Experimental and Theoretical  $^{17}\text{O}$  NMR Study of the Influence of Hydrogen-bonding on C=O and O-H Oxygens in Carboxylic Solids. *J. Phys. Chem. A* **2006**, *110*, 1824-1835.
- (6) Zhang, Q.; Chekmenev, E. Y.; Wittebort, R. J.  $^{17}\text{O}$  Quadrupole Coupling and Chemical Shielding Tensors in an H-bonded Carboxyl Group: Alpha-oxalic Acid. *J. Am. Chem. Soc.* **2003**, *125*, 9140-9146.
- (7) Chekmenev, E. Y.; Waddell, K. W.; Hu, J.; Gan, Z.; Wittebort, R. J.; Cross, T. A. Ion-binding Study by  $^{17}\text{O}$  Solid-state NMR Spectroscopy in the Model Peptide Gly-Gly-Gly at 19.6 T. *J. Am. Chem. Soc.* **2006**, *128*, 9849-9855.
